# Supplementary material for: Low-dose patterning of platinum nanoclusters on carbon nanotubes by focused-electron-beam-induced deposition as studied by TEM
Source: publisher site journal article supplement (doi:10.3762/bjnano.4.9), 2013-02-04
Supplement: Additional file 2 [file 2190-4286-4-9-S2.pdf]

# Supporting Information

for

## **Low-dose patterning of Pt nanoclusters on carbon nanotubes by focused-electron-beam-induced deposition as studied by TEM**

Xiaoxing Ke <sup>\*1</sup>, Carla Bittencourt <sup>2</sup>, Sara Bals <sup>1</sup> and Gustaaf Van Tendeloo <sup>1</sup>

<sup>1</sup>EMAT, University of Antwerp, Groenenborgerlaan 171, 2020 Antwerp, Belgium and

<sup>2</sup>Chemistry of Interaction Plasma Surface (ChiPS), University of Mons, Place du Parc 20, 7000 Mons, Belgium

Email: Xiaoxing Ke – Xiaoxing.Ke@ua.ac.be

\* Corresponding author

**Detailed deposition parameters**

# Detailed deposition parameters

**Table S1:** Detailed deposition parameters for Figure 4.

|               | a               | b               | c                 | d                 |
|---------------|-----------------|-----------------|-------------------|-------------------|
| Beam voltage  | 30 kV           | 30 kV           | 30 kV             | 30kV              |
| Beam current  | 0.2 nA          | 0.2 nA          | 0.2 nA            | 0.2nA             |
| Defocus value | 0 $\mu\text{m}$ | 4 $\mu\text{m}$ | 8 $\mu\text{m}$   | 10 $\mu\text{m}$  |
| pitch         | 2.5 nm          | 17.6 nm         | 35.0 nm           | 43.7nm            |
| Loop time     | 168.1 ms        | 3.3 ms          | 843 $\mu\text{s}$ | 554 $\mu\text{s}$ |
| passes        | 2               | 103             | 412               | 638               |
| blur          | 0 nm            | 17.5 nm         | 34.9 nm           | 43.7nm            |

**Table S2:** Detailed deposition parameters for Figure 6.

| Beam current =<br>0.2 nA                   | Dwell time =<br>50 ns                                    | Dwell time =<br>100 ns                                  | Dwell time =<br>500 ns                              | Dwell time =<br>1 $\mu\text{s}$                      | Dwell time =<br>10 $\mu\text{s}$                     |
|--------------------------------------------|----------------------------------------------------------|---------------------------------------------------------|-----------------------------------------------------|------------------------------------------------------|------------------------------------------------------|
| Beam voltage =<br>1 kV,<br>pitch = 19.68nm | $t_{\text{loop}} = 134.6\mu\text{s}$ ,<br>Passes = 13800 | $t_{\text{loop}} = 267.2\mu\text{s}$ ,<br>Passes = 6908 | N/A                                                 | $t_{\text{loop}} = 2.7 \text{ ms}$ ,<br>Passes = 692 | $t_{\text{loop}} = 26.5\text{ms}$ ,<br>Passes = 69   |
| Beam voltage =<br>3kV,<br>pitch = 8.03nm   | $t_{\text{loop}} = 847\mu\text{s}$ ,<br>Passes = 2385    | $t_{\text{loop}} = 1.7\text{ms}$ ,<br>Passes = 1194     | $t_{\text{loop}} = 8.5\text{ms}$ ,<br>Passes = 239  | $t_{\text{loop}} = 16.9\text{ms}$ ,<br>Passes = 119  | $t_{\text{loop}} = 160\text{ms}$ ,<br>Passes = 12    |
| Beam voltage =<br>5kV,<br>pitch = 6.22nm   | $t_{\text{loop}} = 1.4\text{ms}$ ,<br>Passes = 1200      | $t_{\text{loop}} = 2.7 \text{ ms}$ ,<br>Passes = 600    | $t_{\text{loop}} = 13.5\text{ms}$ ,<br>Passes = 120 | $t_{\text{loop}} = 26.9\text{ms}$ ,<br>Passes = 60   | $t_{\text{loop}} = 269\text{ms}$ ,<br>Passes = 6     |
| Beam voltage =<br>10 kV,<br>pitch = 4.4nm  | $t_{\text{loop}} = 3\text{ms}$ ,<br>Passes = 600         | $t_{\text{loop}} = 6.1\text{ms}$ ,<br>Passes = 300      | $t_{\text{loop}} = 30.4\text{ms}$ ,<br>Passes = 60  | $t_{\text{loop}} = 60.8\text{ms}$ ,<br>Passes = 30   | $t_{\text{loop}} = 607.6\text{ms}$ ,<br>Passes = 3   |
| Beam voltage =<br>15 kV,<br>pitch = 3.6nm  | $t_{\text{loop}} = 4.4\text{ms}$ ,<br>Passes = 450       | $t_{\text{loop}} = 7.9\text{ms}$ ,<br>Passes = 260      | $t_{\text{loop}} = 44.5\text{ms}$ ,<br>Passes = 45  | $t_{\text{loop}} = 79\text{ms}$ ,<br>Passes = 26     | $t_{\text{loop}} = 789.6 \text{ ms}$ ,<br>Passes = 3 |
| Beam voltage =<br>30 kV,<br>pitch = 2.5nm  | $t_{\text{loop}} = 8.4\text{ms}$ ,<br>Passes = 238       | $t_{\text{loop}} = 16.8\text{ms}$ ,<br>Passes = 120     | $t_{\text{loop}} = 84\text{ms}$ ,<br>Passes = 24    | $t_{\text{loop}} = 168.1\text{ms}$ ,<br>Passes = 12  | $t_{\text{loop}} = 2\text{s}$ ,<br>Passes = 1        |
